# Supplementary material for: Validity and reliability of Turkish version of the scales of perceived stigma for children with epilepsy and their parents
Source: PubMed Central journal article supplement — Int J Nurs Sci. 2018 Jul 11;5(3):238–42. doi: 10.1016/j.ijnss.2018.07.004 (PMC6626211; doi:10.1016/j.ijnss.2018.07.004), 2018-07-11
Supplement: mmc1.pdf [file mmc1.pdf]

Tarih: \_\_\_\_/\_\_\_\_/\_\_\_\_

Görüşmeci İsmi'nin Baş Harfleri: \_\_\_\_\_

Aile No:

Aile Üyesi: (E, K)

Ziyaret: \_\_\_\_\_

### DAMGALANMA ÖLÇEĞİ (Ebeveyn)

Lütfen, aşağıdaki ifadelerden her birine ne kadar katıldığınızı belirtin. Cevaplarımız aşağıdaki yanıtlar bazında değerlendirilecektir:

1 = Kesinlikle Katılmıyorum

2 = Katılmıyorum

3 = Kararsızım

4 = Katılıyorum

5 = Kesinlikle Katılıyorum

|                                                                                                                 |   |   |   |   |   |
|-----------------------------------------------------------------------------------------------------------------|---|---|---|---|---|
| 1. _____ 'un bir nöbet durumu olduğunu bilenler, ona farklı davranıyor.                                         | 1 | 2 | 3 | 4 | 5 |
| 2. _____ 'un nöbet durumu hakkında insanlara ne söylediğim önemli değil; onlar genellikle bildiklerini okurlar. | 1 | 2 | 3 | 4 | 5 |
| 3. _____, nöbet durumundan dolayı her zaman kendini kanıtlamak zorunda kalıyor.                                 | 1 | 2 | 3 | 4 | 5 |
| 4. _____ nöbet durumu nedeniyle, bir eş bulmakta sorun yaşayacak.                                               | 1 | 2 | 3 | 4 | 5 |
| 5. _____, nöbet durumu yüzünden çoğu insanın kafasında damgalanmış durumda.                                     | 1 | 2 | 3 | 4 | 5 |

**Uygulama ve Puanlama:** Uygulama için, boşluklara ya "çocuğum" sözcüğünü ya da "kızım/ oğlum" sözcüğünü yazınız. Ölçeği puanlamak amacıyla ortalama bir puan elde etmek için maddelere verilen puanları toplayıp madde sayısına (5) bölünüz.
